# Supplementary material for: Bromine Ion-Intercalated Layered Bi2WO6 as an Efficient Catalyst for Advanced Oxidation Processes in Tetracycline Pollutant Degradation Reaction
Source: MDPI journal article supplement (doi:10.3390/nano13182614), 2023-09-21
Supplement: s1 [file s1]

# **Bromine Ion-Intercalated Layered $\text{Bi}_2\text{WO}_6$ as an Efficient Catalyst for Advanced Oxidation Processes in Tetracycline Pollutant Degradation Reaction**

**Rama Krishna Chava \* and Misook Kang \***

Department of Chemistry, College of Natural Sciences, Yeungnam University, 280 Daehak-ro, Gyeongsan, Gyeongbuk 38541, Republic of Korea

\* Correspondence: drcrkphysics@hotmail.com or rama@ynu.ac.kr (R.K.C.); mskang@ynu.ac.kr (M.K.)

## Visible photocatalytic tetracycline degradation experiments of $\text{Bi}_2\text{WO}_6$ nanostructures

The corresponding aqueous TC absorbance spectra (monitored at 358 nm) of BW samples at different stages of the light irradiation were provided in Fig. 10a-d. The absorption intensity of TC at 358 nm declines gradually with the irradiation time, proposing that TC molecules in an aqueous solution are destructed through the visible-light-driven photocatalytic reaction.

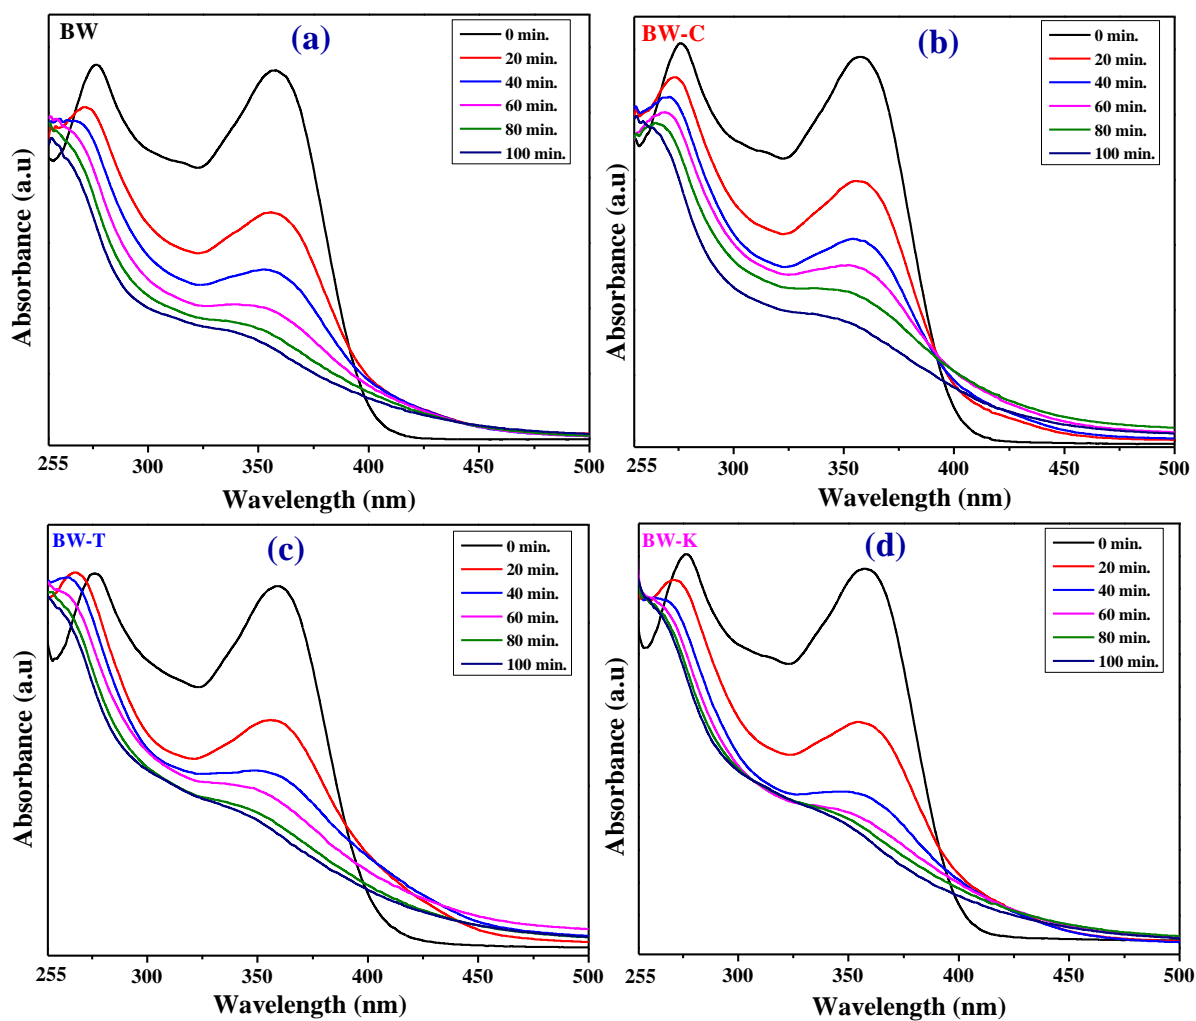

Figure S1. Visible light driven tetracycline degradation curves over (a) BW, (b) BW-C, (c) BW-T and (d) BW-K photocatalysts.

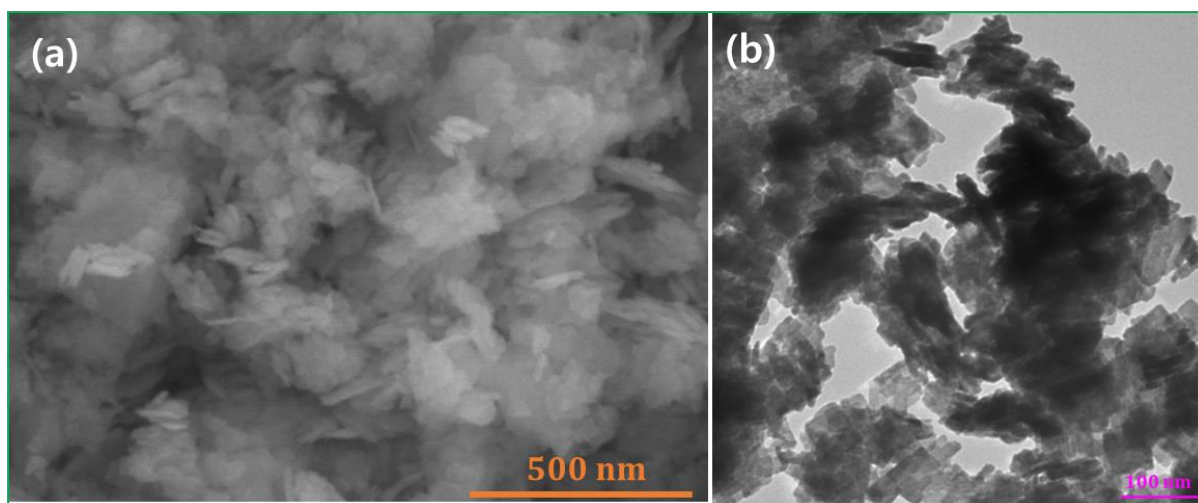

Figure S2. (a) FE-SEM and (b) TEM images of the BW-K photocatalyst sample after cycling reactions.

**Table S1.** Bi<sub>2</sub>WO<sub>6</sub> based photocatalysts for pollutant degradation reactions

| Photocatalyst                                                                            | Light source                         | Pollutants                                                   | Photocatalytic efficiency | Reference                     |
|------------------------------------------------------------------------------------------|--------------------------------------|--------------------------------------------------------------|---------------------------|-------------------------------|
| ultrathin Bi <sub>2</sub> WO <sub>6</sub> nanosheet                                      | 300 W Xe lamp<br>$\lambda > 420$ nm  | sulfamethoxazole                                             | 63%                       | Ma, et al., 2023[32]          |
| 3D flower-like Bi <sub>2</sub> WO <sub>6</sub>                                           | 300 W Xe lamp<br>$\lambda > 420$ nm  | Tetracycline                                                 | 49%                       | Li, et al., 2023[39]          |
| BiOBr/Bi <sub>2</sub> WO <sub>6</sub>                                                    | 1000 W Xe lamp<br>$\lambda > 420$ nm | Phenol                                                       | 65%                       | Pancielejko, et al., 2021[50] |
| I-doped Bi <sub>2</sub> WO <sub>6</sub> Nanosheets                                       | Fenton process                       | Bisphenol A                                                  | 78%                       | Xu, et al., 2021[38]          |
| Bi <sub>2</sub> WO <sub>6</sub> /DMPBP[5]                                                | 350 W Xe lamp<br>$\lambda > 420$ nm  | Rhodamine B                                                  | 93%                       | Jia, et al., 2023[24]         |
| Br-terminated 2D Bi <sub>2</sub> WO <sub>6</sub>                                         | 300 W Xe lamp<br>$\lambda > 420$ nm  | Methyl Orange                                                | -                         | Hu, et al., 2021[59]          |
| Bi <sub>2</sub> W <sub>x</sub> Mo <sub>1-x</sub> O <sub>6</sub>                          | 30 W LED                             | Methylene Blue                                               | 56.6%                     | Belousov, et al, 2023[23]     |
| Bi <sub>2</sub> WO <sub>6</sub> /ZnSnO <sub>3</sub>                                      | 300 W Xe lamp<br>$\lambda > 420$ nm  | Rhodamine B                                                  | 98%                       | Zhao, et al., 2023[53]        |
| WO <sub>3</sub> /Bi <sub>2</sub> WO <sub>6</sub><br>CdS/ Bi <sub>2</sub> WO <sub>6</sub> | 350 W Xe lamp<br>$\lambda < 420$ nm  | K <sub>2</sub> Cr <sub>2</sub> O <sub>7</sub><br>Rhodamine B | 53.82%<br>60.82%          | Zhao, et al., 2023[51]        |
| I-doped Bi <sub>2</sub> WO <sub>6</sub>                                                  | 150 Xe lamp<br>$\lambda < 400$ nm    | Rhodamine B                                                  | 80 %                      | Wang, et al., 2018[48]        |
| C-doped Bi <sub>2</sub> WO <sub>6</sub>                                                  | 300 W Xe lamp<br>$\lambda > 420$ nm  | Tetracycline                                                 | 84.6%                     | Jiang, et al., 2023[54]       |
| Br <sup>-</sup> intercalated Bi <sub>2</sub> WO <sub>6</sub> nanoplates                  | 150 W Xe lamp<br>$\lambda > 420$ nm  | Tetracycline<br>20 ppm                                       | 84%                       | Present work                  |

## References

- [59] Hu, S. J., Fei, Q. R., Li, Y. J., Wang, B. L., Yu, Y. J., 2021. Br-terminated 2D Bi<sub>2</sub>WO<sub>6</sub> nanosheets as a sensitive light-regenerated electrochemical sensor for detecting sulfamethoxazole antibiotic. *Surf. Interfaces*, 25, 101302. <https://doi.org/10.1016/j.surfin.2021.101302>
